# Supplementary material for: Associations of Midpoint of Sleep and Night Sleep Duration with Type 2 Diabetes Mellitus in Chinese Rural Population: The Henan Rural Cohort
Source: Research Square preprint supplement (doi:10.21203/rs.3.rs-144639/v1), 2021-01-15
Supplement: Supplementary file 1 [file d26e6c89f68107be90f95901.docx]

**Supplementary table 1. The demographic characteristics of subjects according to midpoint of sleep**

| **Variables** | **Early** | **Intermediate** | **Late** | ***P*** |
| --- | --- | --- | --- | --- |
| N | 11560 | 16456 | 9260 |  |
| Age(year), mean±SD | 61.02±9.72 | 56.03±11.08 | 49.66±13.34 | <0.001 |
| Gender, n (%) |  |  |  | <0.001 |
| Men | 4664(40.35) | 6220(37.80) | 3572(38.57) |  |
| Women | 6896(59.65) | 10236(62.20) | 5688(61.43) |  |
| Marital status, n (%) |  |  |  | <0.001 |
| Married/cohabitation | 10032(86.78) | 14974(90.99) | 8368(90.37) |  |
| Unmarried/divorced/widowed | 1528(13.22) | 1428(9.01) | 892(9.63) |  |
| Educational levels, n (%) |  |  |  | <0.001 |
| Primary school or below | 6970(60.29) | 7243(44.01) | 2929(31.63) |  |
| Junior high school | 3712(32.11) | 6929(42.11) | 4018(43.39) |  |
| Senior high school or above | 878(7.60) | 2284(13.88) | 2313(24.98) |  |
| Average income per month, n (%) |  |  |  | <0.001 |
| <500 RMB | 4951(42.83) | 5877(35.71) | 2727(29.45) |  |
| 500- RMB | 3643(31.51) | 5518(33.53) | 3140(33.91) |  |
| ≥1000 RMB | 2966(25.66) | 5061(30.75) | 3393(36.64) |  |
| High vegetables and fruits intake, n (%) | 4529(39.18) | 7246(44.04) | 3859(41.68) | <0.001 |
| High fat diet, n (%) | 1861(16.10) | 3020(18.35) | 2174(23.48) | <0.001 |
| Current smoking, n (%) | 1879(16.25) | 2888(17.55) | 2160(23.33) | <0.001 |
| Current drinking, n (%) | 1737(15.03) | 2822(17.15) | 1988(21.47) | <0.001 |
| Physical activity, n (%) |  |  |  | <0.001 |
| Light | 3551(30.72) | 4985(30.29) | 3423(36.97) |  |
| Moderate | 4178(36.14) | 6226(37.83) | 3680(39.74) |  |
| Vigorous | 3831(33.14) | 5245(31.87) | 2157(23.29) |  |
| Family history of diabetes, n (%) | 310(2.68) | 728(4.42) | 489(5.28) | <0.001 |
| Body mass index, mean±SD | 24.64±3.57 | 24.91±3.52 | 24.88±3.64 | <0.001 |
| Night sleep duration, mean±SD | 8.19±1.24 | 7.72±1.09 | 7.32±1.45 | <0.001 |
| Napping duration, mean±SD | 58.36±49.75 | 57.99±49.62 | 55.31±52.48 | <0.001 |
| T2DM, n (%) | 1324(11.45) | 1483(9.01) | 773(8.35) | <0.001 |

**Supplementary table 2. Subgroup analysis of the association of midpoint of sleep and night sleep duration with T2DM**

| Category | **OR (95%CI)** | | | |  | **OR (95%CI)** | | | |
| --- | --- | --- | --- | --- | --- | --- | --- | --- | --- |
| Early | Intermediate | Late | P for interaction |  | <5 | 7- | ≥10 | P for interaction |
| Age |  |  |  | <0.001 |  |  |  |  | 0.127 |
| <60 | 1.33(1.16-1.52) | 1.00 | 0.95(0.83-1.08) |  |  | 1.31(0.85-2.01) | 1.00 | 1.24(0.90-1.72) |  |
| ≥60 | 1.11(1.00-1.23) | 1.00 | 1.24(1.07-1.43) |  |  | 1.14(0.81-1.59) | 1.00 | 1.32(1.09-1.61) |  |
| BMI |  |  |  | 0.386 |  |  |  |  | 0.101 |
| <24 | 1.11(0.95-1.28) | 1.00 | 1.07(0.89-1.29) |  |  | 1.19(0.74-1.91) | 1.00 | 1.36(1.03-1.79) |  |
| ≥24 | 1.11(1.01-1.23) | 1.00 | 1.19(1.06-1.33) |  |  | 1.18(0.86-1.61) | 1.00 | 1.20(0.98-1.47) |  |
| Family history of diabetes |  |  |  | 0.134 |  |  |  |  | 0.364 |
| No | 1.16(1.07-1.27) | 1.00 | 1.17(1.06-1.30) |  |  | 1.13(0.85-1.49) | 1.00 | 1.26(1.06-1.49) |  |
| Yes | 0.71(0.50-1.01) | 1.00 | 1.06(0.77-1.47) |  |  | 1.51(0.56-4.03) | 1.00 | 1.69(0.86-3.29) |  |
| Physical activity |  |  |  | 0.422 |  |  |  |  | 0.553 |
| Low | 1.17(1.02-1.34) | 1.00 | 1.15(0.98-1.34) |  |  | 1.04(0.66-1.65) | 1.00 | 1.36(1.07-1.73) |  |
| Moderate | 1.12(0.98-1.29) | 1.00 | 1.10(0.93-1.29) |  |  | 1.27(0.83-1.93) | 1.00 | 1.24(0.91-1.69) |  |
| High | 1.07(0.91-1.25) | 1.00 | 1.29(1.06-1.57) |  |  | 1.15(0.69-1.92) | 1.00 | 1.22(0.85-1.74) |  |
| Smoking |  |  |  | 0.058 |  |  |  |  | 0.417 |
| Never | 1.11(1.01-1.22) | 1.00 | 1.13(1.01-1.27) |  |  | 1.32(0.98-1.78) | 1.00 | 1.25(1.03-1.51) |  |
| Former | 1.07(0.83-1.39) | 1.00 | 0.97(0.69-1.36) |  |  | 0.61(0.14-2.62) | 1.00 | 1.48(0.92-2.39) |  |
| Current | 1.19(0.94-1.52) | 1.00 | 1.30(1.02-1.64) |  |  | 0.70(0.34-1.42) | 1.00 | 1.21(0.72-2.05) |  |
| Drinking |  |  |  | 0.057 |  |  |  |  | 0.094 |
| Never | 1.11(1.01-1.22) | 1.00 | 1.11(0.99-1.24) |  |  | 1.36(1.01-1.82) | 1.00 | 1.27(1.06-1.53) |  |
| Former | 1.58(1.12-2.23) | 1.00 | 1.55(1.02-2.34) |  |  | 1.09(0.35-3.37) | 1.00 | 1.24(0.64-2.40) |  |
| Current | 1.06(0.84-1.33) | 1.00 | 1.22(0.97-1.55) |  |  | 0.47(0.20-1.11) | 1.00 | 1.33(0.83-2.13) |  |

*Adjusted for age, gender, marital status, educational levels, average income per month, high vegetables and fruits intake, high fatty diet, smoking status, drinking status, physical activity, body mass index, family history of diabetes, napping duration, night sleep duration or midpoint of sleep*
